# Supplementary material for: Planning for Informal Urban Green Spaces in African Cities: Children’s Perception and Use in Peri-Urban Areas of Luanda, Angola
Source: MDPI journal article supplement (doi:10.3390/urbansci5030050), 2021-06-25
Supplement: s1 [file s1]

**Table S1. Sample Questions and code book excerpt from preliminary thematic analysis**

| Questions                                                                | Example Quote                                                                                                                                                                                          | Preliminary codes                      | Initial Themes                                                   | Refined Themes                      | Theme Definition                                                                                                     |
|--------------------------------------------------------------------------|--------------------------------------------------------------------------------------------------------------------------------------------------------------------------------------------------------|----------------------------------------|------------------------------------------------------------------|-------------------------------------|----------------------------------------------------------------------------------------------------------------------|
| What kind of IGS are you familiar with in Funda? Where are they located? | <i>There are many kinds of IGS here. The community gardens, open camps, river side and the vacant lots where I play hide and seek. They are in different areas. I can show you where I usually go.</i> | Open camps, gardens, community Gardens | Availability and variety of IGS                                  | IGS classification and distribution | Typology of IGS                                                                                                      |
| What do you use IGS for?<br>Can you share specific activities in IGS?    | <i>Sometimes I play [football] in the Open Spaces, pick fruits at the community garden near my house.</i>                                                                                              | Pick Fruits, play football,            | Provisioning and cultural services (Ecosystem services)          | IGS Use                             | Reported and observed use of IGS in everyday life of children                                                        |
| Why did you use IGS instead of a park?                                   | <i>The small park we have here is destroyed, we (children) rather play at the 'Open Camps' and [under] baobab trees around there than at that park, now it's very boring there [at the park]</i>       | Boring formal park, destroyed park     | The lack of formally planned parks or green spaces (push factor) | Barrier to IGS [p                   | Positive or negative factors considered by children in choosing IGS (whether out of choice or imposed by conditions) |
| What do you think are the benefits you derive from using IGS in Funda    | <i>IGS are good for our health, as we have learned at school, the trees cleanse the air, gives us shade when it's sunny...</i>                                                                         | Shade, clean the air, health           | Value or service (Regulatory services; medicinal value)          | IGS Benefits                        | Perceived benefits or services from IGS that contribute to child's welling or development                            |
| Do you experience any problems in accessing IGS in Funda?                | <i>To go to the river is very difficult, I think. I would love to swim in the river. Dad said the alligators walk around; sometimes robbers. it's such a shame</i>                                     | Robbers, alligators                    | Safety and security                                              | Barrier                             | Factors that inhibit or constrain children's use of and access to IGS                                                |
| What do you think are the cause of these problems?                       | <i>There's no one to manage or make people care for it</i>                                                                                                                                             | Manage, care                           | Planned maintenance or management issues                         | Root cause                          | The factors that generate inhibitors and barriers (cause of problems)                                                |
| What are your suggestions to improve IGS?                                | <i>Make them safe for children, not only wild animals but also robbers... for our safety. Benches, lights in the night would also make IGS perfect like National Parks.</i>                            | Benches, lights                        | Amenities/infrastructure service improvement                     | Suggestions [ideas]                 | Children's Drawings or illustrated proposals for improving the current state of IGS                                  |
| Are you willing to participate in IGS improvement activities?            | <i>Yes, I would, teacher says we need to be responsible for what we do to Nature.</i>                                                                                                                  | Yes, responsible, teacher              | Willingness to engage                                            | Participation                       | The expressed willingness or clear intention to join efforts aimed at better management of IGS.                      |
